# Supplementary material for: Development and validation of a mass spectrometry based analytical method to quantify the ratios in hemagglutinin trimers in quadrivalent influenza nanoparticle vaccine – FluMos-v1
Source: Royal Society of Chemistry journal article supplement (doi:10.1039/d2ay01890j), 2023-01-01
Supplement: d2ay01890j1.pdf [file d2ay01890j1.pdf]

## Supplemental Information

**Development and validation of a mass spectrometry based analytical method to quantify the ratio among Hemagglutinin Trimers in quadrivalent influenza nanoparticle vaccine - FluMos-v1**

Asif Shajahan, Cindy X. Cai, Jeremy Wolff, R. Sylvie Yang, Vera B. Ivleva, Daniel B. Gowetski,  
Jason G.D. Gall, Q. Paula Lei \*

*Vaccine Production Program Laboratory, Vaccine Research Center, National Institute of Allergy and Infectious Diseases, National Institutes of Health, Gaithersburg, MD, USA*

## Experimental Section

**Materials and reagents.** LC-MS grade water and acetonitrile were purchased from J. T. Baker (Center Valley, PA); formic acid was from Thermo Fisher Scientific (Tempe, AZ); guanidine HCl, was purchased from G Bioscience (St. Louis, MO); trypsin was purchased from Promega (Madison, WI); HATs and FluMos v1 cages were prepared in-house.

**Sample preparation.** For trypsin digestion, each sample was first denatured at 37 °C for 3 hrs using 6 M guanidine HCl, which was then diluted 6 times to 1 M guanidine using 50 mM ammonium bicarbonate solution (pH 7.8) as diluent. Protein was then incubated with trypsin at the mass ratio of 4:1 (trypsin: protein) at 37 °C overnight. A final concentration of 0.1% formic acid was added to terminate the digestion. Peptide standards were prepared by mixing the equal amount of tryptic digest of H1, H3 and HBy together with different mass ratio to HBv tryptic digest at 0.2, 0.5, 10, 1.5 and 2.0 without pentamer. For accuracy testing samples, equal amounts of undigested HATs H1, H3 and HBy mixed with HAT HBv at different mass ratio. Pentamer was then added at the mass of ¼ of total HATs followed by gentle vertexing to form FluMos v1 cage, which were then digested by trypsin. Quality control (QC) samples were prepared by mixing equal mass of H1, H3, HBy, HBv and pentamer and vertexing to form FluMos v1 cage which was further denatured and digested by trypsin. Clinical FluMos-v1 products lots were processed directly by denaturing with 6M guanidine HCl and digesting with trypsin.

**Size-exclusion chromatogram coupled with fluorescence detection (SEC-FLR) analysis.** Separation of FluMos v1 was carried out with an Acquity H-class Bio UPLC system (Waters, Milford, MA) operated by Empower 3 software. Samples were injected onto a Acquity BEH SEC column (200 Å, 1.7 µm, 4.6 mm x 50 mm) with mobile phase (2x phosphate buffer saline) delivered at 0.4 mL/min for 10 min. FLR detection was set with excitation and emission wavelengths at 278 nm and 330 nm, respectively.

**LC-MS/MS analysis.** The Acquity H-class Bio UPLC system (Waters Corporation, Milford, MA) operated using MassLynx v4.1 coupled with Q Exactive HF mass spectrometer (Thermo-Fisher Scientific, Waltham, MA) operated through Xcalibur software was used for the LC-MS/MS analysis. Mobile phases A and B consisted of 0.1% (v/v) formic acid in water and acetonitrile, respectively, delivered at a flow rate of 0.2 mL/min. Samples were injected onto a BEH C18 column (300 Å, 1.7 µm, 2.1 mm x 50 mm) heated at 65 °C. The UPLC gradient was (min-%B) 0-5%, 1-5%, 11-25%, 12-95%, 15-95%, 16-5% and 20-5%. The mass spectrometer was operated in positive ionization mode using parallel reaction monitoring (PRM) method. Two peptides were selected for HATs H1, H3 and HBy and one peptide for HBv with the parameters listed in Table 1 to monitor. The capillary voltage was 3.5 kV, and the desolvation temperature was 250 °C.

**Calculation - Preparation of standard curves.** The detected peptide peak areas of selected MS/MS fragment ions of each H1 peptide quantified from LC-MS/MS data by processing through XCalibur software were normalized against the peak area of selected fragment ion of HBv peptide in the same run. H1 peptide standard curves were prepared by plotting the normalized peak area of selected fragments against the premixed mass ratio of H1:HBv. The normalized peak areas of selected peptide fragments of testing samples were back calculated to the mass ratio of H1:HBv according to the standard curve. The average value of H1:HBv ratio was then obtained from two H1 peptides. The similar approach was applied to achieve the mass ratios of H3 and HBy to HBv, respectively. The default ratio of HBv was set as 1. The percentage of each HAT was calculated from the ratio of each HAT by with dividing the sum of all four HAT ratios.

**Table S1.** Types of Hemagglutinin (HA) strain components in the quadrivalent influenza nanoparticle vaccine (FluMos-v1) and nomenclature followed.

| Flu Strain                      | HA Trimer   | HA Trimer abbreviation |
|---------------------------------|-------------|------------------------|
| H1 (A/Idaho/07/2018)            | HAT-H1-ID18 | H1                     |
| H3_A1b_131K (A/Perth/1008/2019) | HAT-H3-PE19 | H3                     |
| HBv (vic-B/Colorado/06/2017)    | HAT-BV-CO17 | HBv                    |
| Hby (Yam-B/Phuket/3073/2013)    | HAT-BY-PH13 | HBy                    |

**Table S2.** Amino acid sequences of proteins used in this study (peptides selected for PRM are highlighted)

**Pentamer:** I53\_dn5A

MGKYDGSKLRIGILHARWNAEILALVLGALKRLQEFQVKRENIIEETVPGSFELP  
YGSKLFVEKQKRLGKPLDAIPIGVLIKGSTMHFEYICDSTTHQLMMLNFELGIPVI  
FGVLTCLTDEQAEARAGLIEGKMHNHGEDWGAAAVEMATKFNLEHHHHHH

**HAT1:** I53\_dn5B HAT-H1-ID18\_H1 (A/Idaho/07/2018)

DTLCIGYHANNSTDTVDTVLEKNVTVTHSVNLLEDKHNGKLCCKLRGVAPLHLGKC  
GWLGNPECESLSTARSWSYIVETSNSDNGTCFPGDFINYEELREQLSSVSSFERFEIFPKTS  
SWPNHDSNKGVTAAACPHAGAKSFYKNLIWLKKGNSYPKLNQTYINDKGKEVLVLWGI  
HHPPTTADQQSLYQNADAYVFGVTSRYSKKFKPEIATRPKVRDQEGRMNYYWTLVEPG  
DKITFEATGNLVVPRYAFTMERNAGSGIIISDTPVHDCNTTCQTPEGAINSTLQFQNVHPIT  
IGKCPKYVKSTKLRLATGLRNVPSIQSRGLFGAIAGFIEGGWTGMVDGWYGYHHQNEQ  
GSGYAADLKSTQNAIDKITNKVNSVIEKMNTQFTAVGKEFNHLEKRIENLNKKVDDGFL  
DIWTYNAELLVLENERLDYHDSNVKNLYEKVRNQLKNNAKEIGNGCFEFYHKCDNT  
CMESVKNGTYDYPKYSEEAKLNREKIDGVSAAEAELAYLLGELAYKLGEYRIAIRAYRIA  
LKRDPNNAEAWYNLGNAYYKQGRYREAIEYYQKALELDPNNAEAWYNLGNAYYERG  
EYEEAIEYYRKALRLDPNNADAMQNLLNAKMREEGGWELQHHHHHH

**HAT2:** I53\_dn5B HAT-H3-PE19\_H3\_A1b\_131K (A/Perth/1008/2019)

QKIPGNDNSTATLCLGHHAVPNGTIVKTITNDRIEVTNATELVQNSSIGEICDSPHQILDGG  
NCTLIDALLGDPQCDGFQNKKWDLFVERSRAYSNCFPYDVPDYASLRSLVASSGTLEFK  
NESFNWAGVKQNGTSSACIRGSSSSFFSRLNWLTHLNYTYPALNVTMPNKEQFDKLYIW  
GVHHPGTDKQIFLYARSSGRITVSTRSQQA VIPNIGFRPRIRDIPSRSISYWTIVKPGDIL  
LINSTGNLIAPRGYFKIRSGKSSIMRSDAPIGKCKSECITPNGSIPNDKPFQNVNRITYGACP  
RYVKQSTLKLATGMRNVPEKQTRGIFGAIAGFIENGWEGMMDGWYGFRHQNSEGRGQ  
AADLKSTQAAIDQINGKLNRLIGKTNEKHFHQIEKEFSEVEGRVQDLEKYVEDTKIDLWS

YNAELLVALENQHTIDLTDSEMNKLFEKTKKQLRENAEDMGNGCFKIYHKCDNACIGSI  
RNGTYDHNVYRDEALNNRFQIKGVGGSAEEAELAYLLGELAYKLGEYRIAIRAYRIALK  
RDPNNAEAWYNLGNAYYKQGRYREAIEYYQKALELDPNNAEAWYNLGNAYYERGEY  
EEAIEYYRKALRLDPNNADAMQNLLNAKMREEGGWELQH HHHHHH

**HAT3:** I53\_dn5B HAT-BV-CO17\_HBv (vic-B/Colorado/06/2017)

DRICTGITSSNSPHVVKATATQGEVNVTVGIPLTTTPTKSHFANLKGTETRGKLCPKCLNCT  
DLDVALGRPKCTGKIPSARVSILHEVRPVTSGCFPIMHDRTKIRQLPNLLRGYEHVRLSTH  
NVINAEGAPGGPYKIGTSGSCPNTNGNGFFATMAWAVPDKNKTATNPLTIEVPYVCTEG  
EDQITVWGFHSDNETQMAKLYGDSKPKFTSSANGVTTHYVSQIGGFNPQTEDGGLPQS  
GRIVVDYMVQKSGKTGTITYQRGILLPOKVWCASGRSKVIKGSPLIGEADCLHEKYGG  
LNKSKPYTGEHAKAIGNCPIWVKTPKLANGTKYRPPAKLLKERGFFGAIAGFLEGGW  
EGMIAGWHGYTSHGAHGVAVAADLKSTQEAINKITKNLNSLSELEVKNLQRLSGAMDE  
LHNEILELDEKVDDLADRTISSQIELAVLLSNEGIINSEDEHLLALERKLLKMLGPSAVEIG  
NGCFETKHKCNQTCLDKIAAGTFDAGEFSLPTFDSL NITAASAEELAYLLGELAYKLG  
EYRIAIRAYRIALKRDPNNAEAWYNLGNAYYKQGRYREAIEYYQKALELDPNNAEAWY  
NLGNAYYERGEYEEAIEYYRKALRLDPNNADAMQNLLNAKMREEGGWELQH HHHHHH

**HAT4:** I53\_dn5B HAT-BY-PH13\_Hby (Yam-B/Phuket/3073/2013)

DRICTGITSSNSPHVVKATATQGEVNVTVGIPLTTTPTKSYFANLKGTRTRGKLCPCDCLNCT  
DLDVALGRPMC VGTTPSAKASILHEVRPVTSGCFPIMHDRTKIRQLPNLLRGYEKIRLST  
QNVIDAEKAPGGPYRLGTSGSCP NATSKIGFFATMAWAVPKDNYKNATNPLTVEVPYIC  
TEGEDQITVWGFHSDNKTQMKSLYGDSNPQKFTSSANGVTTHYVSQIGDFPDQTEDGG  
LPQSGRIVVDYMMQKPGKTGTIVYQRGVLLPQK VWCASGRSKVIKGSPLIGEADCLHE  
EYGGLNKSKPYT GKHAKAIGNCPIWVKTPKLANGTKYRPPAKLLKERGFFGAIAGFL  
EGGWEGMIAGWHGYTSHGAHGVAVAADLKSTQEAINKITKNLNSLSELEVKNLQRLSG  
AMDELHNEILELDEKVDDLADRTISSQIELAVLLSNEGIINSEDEHLLALERKLLKMLGPS  
AVDIGNGCFETKHKCNQTCLDRIAAGTFNAGEFSLPTFDSL NITAASAEELAYLLGEL  
AYKLGEYRIAIRAYRIALKRDPNNAEAWYNLGNAYYKQGRYREAIEYYQKALELDPNN  
AEAWYNLGNAYYERGEYEEAIEYYRKALRLDPNNADAMQNLLNAKMREEGGWELQH  
HHHHH

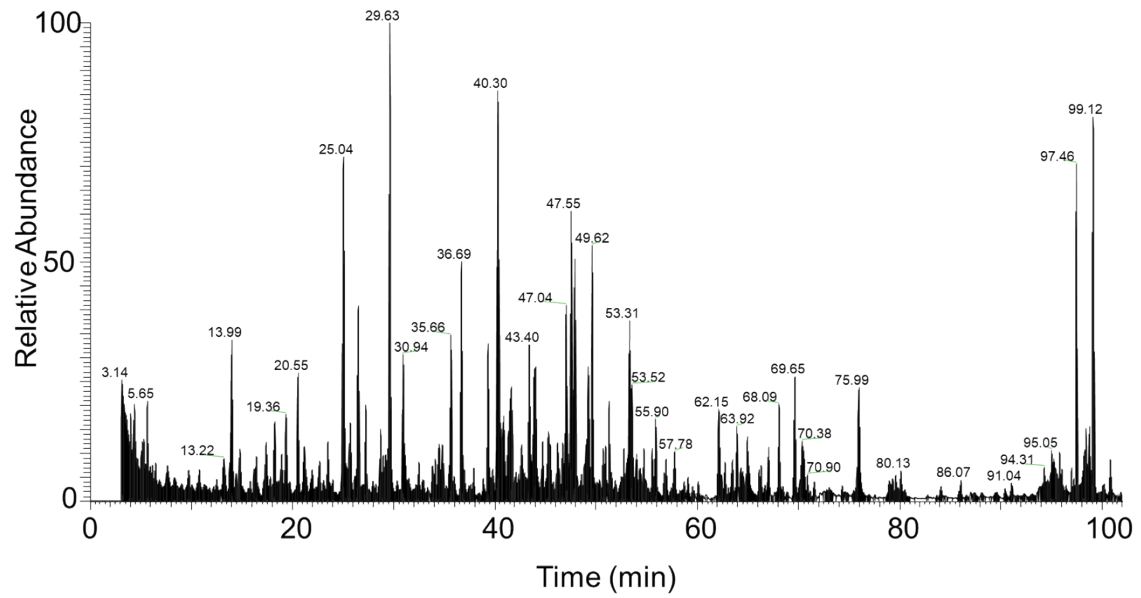

**Figure S1.** Total ion chromatography (TIC) of tryptic digest of FluMos-v1 using 6 M guanidine denaturation for 30 min. High abundant peaks eluted after 80 min were observed, which are large peptides with missed cleavages.

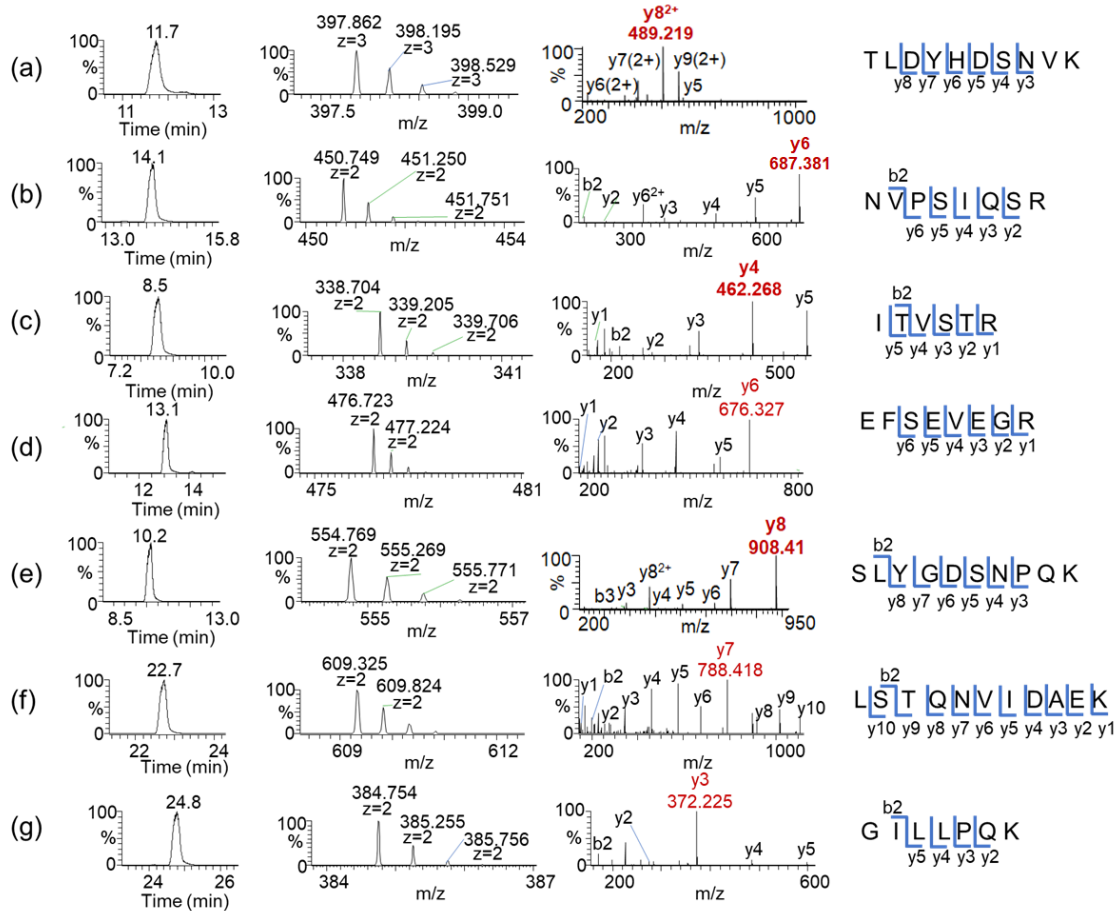

**Figure S2.** Signature peptides of H1, H3, HBy and HBv selected for quantification from 40 min LC-MS/MS run. XICs (left), MS full scan spectra (middle), and MS/MS spectra (right). H1 peptides (a) T434-K443 eluted at 11.7 min, with full scan m/z 397.862 and (b) N320-R327 eluted at 14.1 min, with full scan m/z 450.749. H3 peptides (c) I202-K270 eluted at 8.5 min with full scan m/z 338.704, and (d) E398-R405 eluted at 13.1 min, with full scan m/z 476.723. HBy peptides (e) S202-K211 eluted at 10.2 min, with full scan m/z 554.769, and (f) L119-K129 eluted at 22.7 min with full scan m/z 609.325. HBv peptides G264-K270 eluted at 24.8 min with full scan m/z 384.8. Good MS/MS sequence coverage was observed for all peptides.

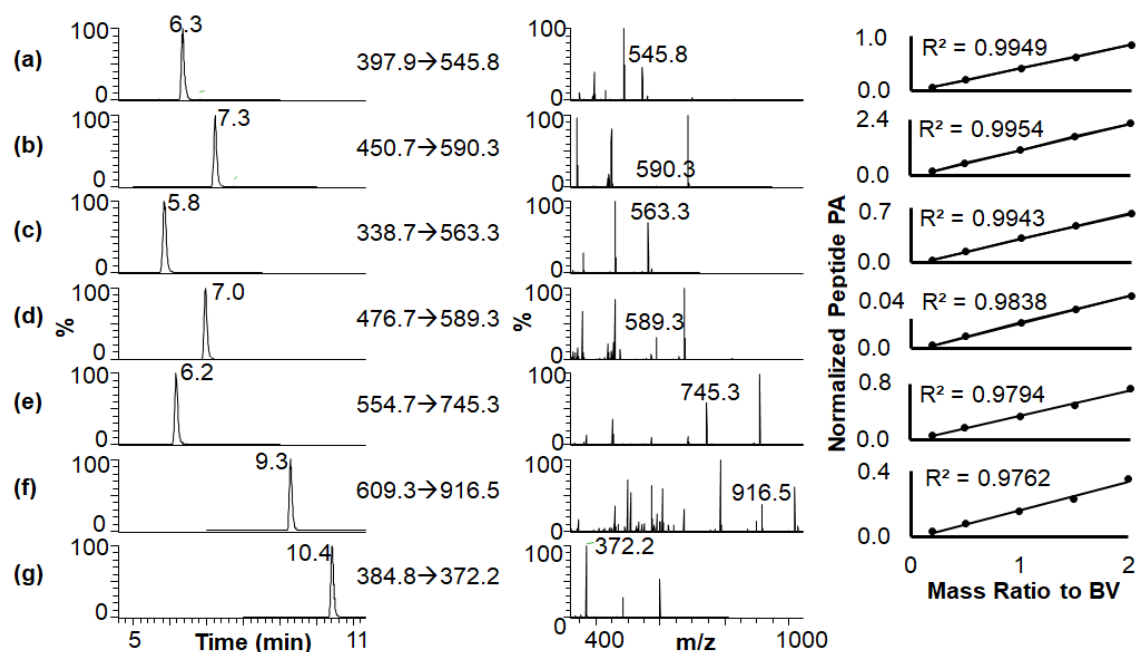

**Figure S3.** The extracted ion chromatograms of the selected MS/MS fragment ion (20 min LC run) of each HAT peptide are in the left, MS/MS spectra of each HAT peptide in the middle and the corresponding linear standard curves of normalized peptide peak area (PA) and ratio of each HAT to HBv on the right (refer to Table S8 for the selected PRM parameters) For peptide standard curves, y-axis is each peptide PA of H1, H3 and HBv divided by HBv peptide PA in the same run, and x-axis is the mass ratio between H1, H3 and HBv to HBv.

**Table S3.** Limit of Detection (LOD) and Limit of Quantification (LOQ) of ratio of peptides with standard HBv peptide.

| <i>Standard error method</i>                   | H1        |           | H3        |           | HBy       |           |
|------------------------------------------------|-----------|-----------|-----------|-----------|-----------|-----------|
|                                                | Peptide 1 | Peptide 2 | Peptide 1 | Peptide 2 | Peptide 1 | Peptide 2 |
| Limit of Detection (LOD) of peptide ratio      | 0.041     | 0.063     | 0.081     | 0.046     | 0.255     | 0.275     |
| Limit of Quantification (LOQ) of peptide ratio | 0.125     | 0.191     | 0.246     | 0.139     | 0.772     | 0.834     |

**Table S4.** Accuracy for percentage of H1, H3, HBy and HBv analyzed by analyst 1 on day 1

| H1, H3 & HBy | H1              |          | H3           |          | HBy          |          | HBv          |                 |          |
|--------------|-----------------|----------|--------------|----------|--------------|----------|--------------|-----------------|----------|
|              | Theoretical (%) | Each (%) | Accuracy (%) | Each (%) | Accuracy (%) | Each (%) | Accuracy (%) | Theoretical (%) | Each (%) |
| 12.5         | 13.3            | 106.5    | 14.1         | 112.6    | 14.0         | 111.9    | 62.5         | 58.6            | 93.8     |
| 20.0         | 22.7            | 113.4    | 19.0         | 95.2     | 19.8         | 99.0     | 40.0         | 38.5            | 96.2     |
| 25.0         | 27.7            | 110.6    | 22.0         | 88.0     | 25.3         | 101.1    | 25.0         | 25.1            | 100.3    |
| 27.3         | 29.7            | 109.0    | 24.0         | 87.9     | 26.7         | 98.0     | 18.2         | 19.6            | 107.7    |
| 28.6         | 32.5            | 113.8    | 24.5         | 85.9     | 28.0         | 98.1     | 14.3         | 14.9            | 104.4    |

**Table S5.** Accuracy for percentage of H1, H3, HBy and HBv analyzed by analyst 2 on day 2

| H1, H3 & HBy | H1              |          | H3           |          | HBy          |          | HBv          |                 |          |
|--------------|-----------------|----------|--------------|----------|--------------|----------|--------------|-----------------|----------|
|              | Theoretical (%) | Each (%) | Accuracy (%) | Each (%) | Accuracy (%) | Each (%) | Accuracy (%) | Theoretical (%) | Each (%) |
| 12.5         | 12.7            | 101.5    | 12.9         | 103.1    | 11.6         | 93.0     | 62.5         | 62.8            | 100.5    |
| 20.0         | 22.5            | 112.6    | 19.2         | 96.0     | 18.8         | 93.8     | 40.0         | 39.5            | 98.8     |
| 25.0         | 27.4            | 109.5    | 26.0         | 103.8    | 23.4         | 93.8     | 25.0         | 23.2            | 93.0     |
| 27.3         | 30.7            | 112.4    | 27.2         | 99.7     | 25.0         | 91.8     | 18.2         | 17.1            | 94.2     |
| 28.6         | 31.5            | 110.1    | 28.3         | 99.0     | 26.4         | 92.3     | 14.3         | 13.9            | 97.2     |

**Table S6.** Accuracy for percentage of H1, H3, HBy and HBv analyzed by analyst 2 on day 3

| H1, H3 & HBy | H1              |          | H3           |          | HBy          |          | HBv          |                 |          |
|--------------|-----------------|----------|--------------|----------|--------------|----------|--------------|-----------------|----------|
|              | Theoretical (%) | Each (%) | Accuracy (%) | Each (%) | Accuracy (%) | Each (%) | Accuracy (%) | Theoretical (%) | Each (%) |
| 12.5         | 13.0            | 104.0    | 11.0         | 87.9     | 10.9         | 87.2     | 62.5         | 65.1            | 104.2    |
| 20.0         | 21.8            | 109.1    | 18.7         | 93.3     | 18.5         | 92.3     | 40.0         | 41.1            | 102.7    |
| 25.0         | 27.4            | 109.7    | 23.6         | 94.5     | 24.3         | 97.3     | 25.0         | 24.6            | 98.5     |
| 27.3         | 30.0            | 110.0    | 26.0         | 95.2     | 27.0         | 98.8     | 18.2         | 17.1            | 94.0     |
| 28.6         | 34.4            | 120.5    | 26.2         | 91.7     | 26.0         | 91.2     | 14.3         | 13.3            | 93.2     |



**Table S7.** Accuracy measurement of each HAT percentage for 5 individually prepared QC samples

| Theoretical (%) | Replicates | H1       |              | H3       |              | HBy      |              | HBv      |              |
|-----------------|------------|----------|--------------|----------|--------------|----------|--------------|----------|--------------|
|                 |            | Each (%) | Accuracy (%) |
| 25.0            | 1          | 28.0     | 111.8        | 22.3     | 89.1         | 24.8     | 99.1         | 25.0     | 100.0        |
|                 | 2          | 27.7     | 110.8        | 22.2     | 88.8         | 24.4     | 97.5         | 25.7     | 103.0        |
|                 | 3          | 27.5     | 109.9        | 22.8     | 91.0         | 24.4     | 97.8         | 25.3     | 101.3        |
|                 | 4          | 27.0     | 108.0        | 22.3     | 89.4         | 24.5     | 97.9         | 26.2     | 104.7        |
|                 | 5          | 27.7     | 110.8        | 21.5     | 86.1         | 25.1     | 100.3        | 25.7     | 102.8        |
| Average (n=5)   |            | 27.6     |              | 22.2     |              | 24.6     |              | 25.6     |              |
| RSD% (n=5)      |            | 1.3      |              | 2.0      |              | 1.2      |              | 1.7      |              |

**Table S8.** The parameters of second fragment ion based PRM method for monitoring HAT peptides. The precursor ion m/z, charge states and collision energy (CE), second fragment ion range, and the corresponding peptide retention times were included.

| HATs                     | Signature Peptides                         | Precursor Ions |   |         | Fragment ion (m/z)        | RT (±5 min) |
|--------------------------|--------------------------------------------|----------------|---|---------|---------------------------|-------------|
|                          |                                            | m/z            | z | CE (eV) |                           |             |
| H1                       | T <sup>434</sup> LDYHDSNVK <sup>443</sup>  | 397.9          | 3 | 15      | 545.8 (y9 <sup>2+</sup> ) | 6.3         |
|                          | N <sup>320</sup> VPSIQSR <sup>327</sup>    | 450.7          | 2 | 15      | 590.3 (y5)                | 7.3         |
| H3                       | I <sup>202</sup> TVSTR <sup>207</sup>      | 338.7          | 2 | 20      | 563.3 (y5)                | 5.8         |
|                          | E <sup>398</sup> FSEVEGR <sup>405</sup>    | 476.7          | 2 | 20      | 589.3 (y5)                | 7.0         |
| HBy                      | S <sup>202</sup> LYGDSNPQK <sup>211</sup>  | 554.8          | 2 | 20      | 745.3 (y7)                | 6.2         |
|                          | L <sup>119</sup> STQNVIDAEK <sup>129</sup> | 609.3          | 2 | 20      | 916.5 (y8)                | 9.3         |
| <i>Internal standard</i> |                                            |                |   |         |                           |             |
| HBv                      | G <sup>264</sup> ILLPQK <sup>270</sup>     | 384.8          | 2 | 20      | 372.2 (y3)                | 10.4        |

**Table S9.** Accuracy for percentage of H1, H3, HBy and HBv quantified based on second fragment ion from PRM data (88.9-115.6%)

| H1, H3 & HBy    | H1       |              | H3       |              | HBy      |              | HBv             |          |              |
|-----------------|----------|--------------|----------|--------------|----------|--------------|-----------------|----------|--------------|
| Theoretical (%) | Each (%) | Accuracy (%) | Each (%) | Accuracy (%) | Each (%) | Accuracy (%) | Theoretical (%) | Each (%) | Accuracy (%) |
| 12.5            | 14.2     | 113.4        | 13.8     | 110.7        | 13.7     | 109.9        | 62.5            | 58.6     | 93.7         |
| 20.0            | 23.6     | 118.2        | 19.3     | 96.4         | 19.7     | 98.7         | 40.0            | 39.1     | 97.6         |
| 25.0            | 27.3     | 109.0        | 22.5     | 90.1         | 25.7     | 102.8        | 25.0            | 25.7     | 102.9        |
| 27.3            | 29.5     | 108.2        | 24.5     | 89.8         | 27.2     | 99.7         | 18.2            | 19.9     | 109.4        |
| 28.6            | 33.0     | 115.6        | 25.4     | 88.9         | 28.6     | 100.1        | 14.3            | 15.4     | 107.5        |

**Table S10.** Good intermediate precisions for one sample run by 2 analysts in 3 days (total 3 runs)

| Analyst     | Day | H1%  | H3%  | HBy% | HBv% |
|-------------|-----|------|------|------|------|
| 1           | 1   | 27.0 | 20.3 | 25.2 | 27.5 |
| 2           | 2   | 27.1 | 22.4 | 23.1 | 27.3 |
| 2           | 3   | 28.2 | 21.4 | 22.1 | 28.2 |
| Ave.% (n=3) |     | 27.4 | 21.4 | 23.5 | 27.7 |
| RSD% (n=3)  |     | 2.4  | 4.9  | 6.7  | 1.7  |
